# Supplementary material for: CLK1/SRSF5 pathway induces aberrant exon skipping of METTL14 and Cyclin L2 and promotes growth and metastasis of pancreatic cancer
Source: PubMed Central journal article supplement (PMC8045197; doi:10.1186/s13045-021-01072-8), 2021-04-13
Supplement: 13045_2021_1072_MOESM8_ESM.pdf [file 13045_2021_1072_MOESM8_ESM.pdf]

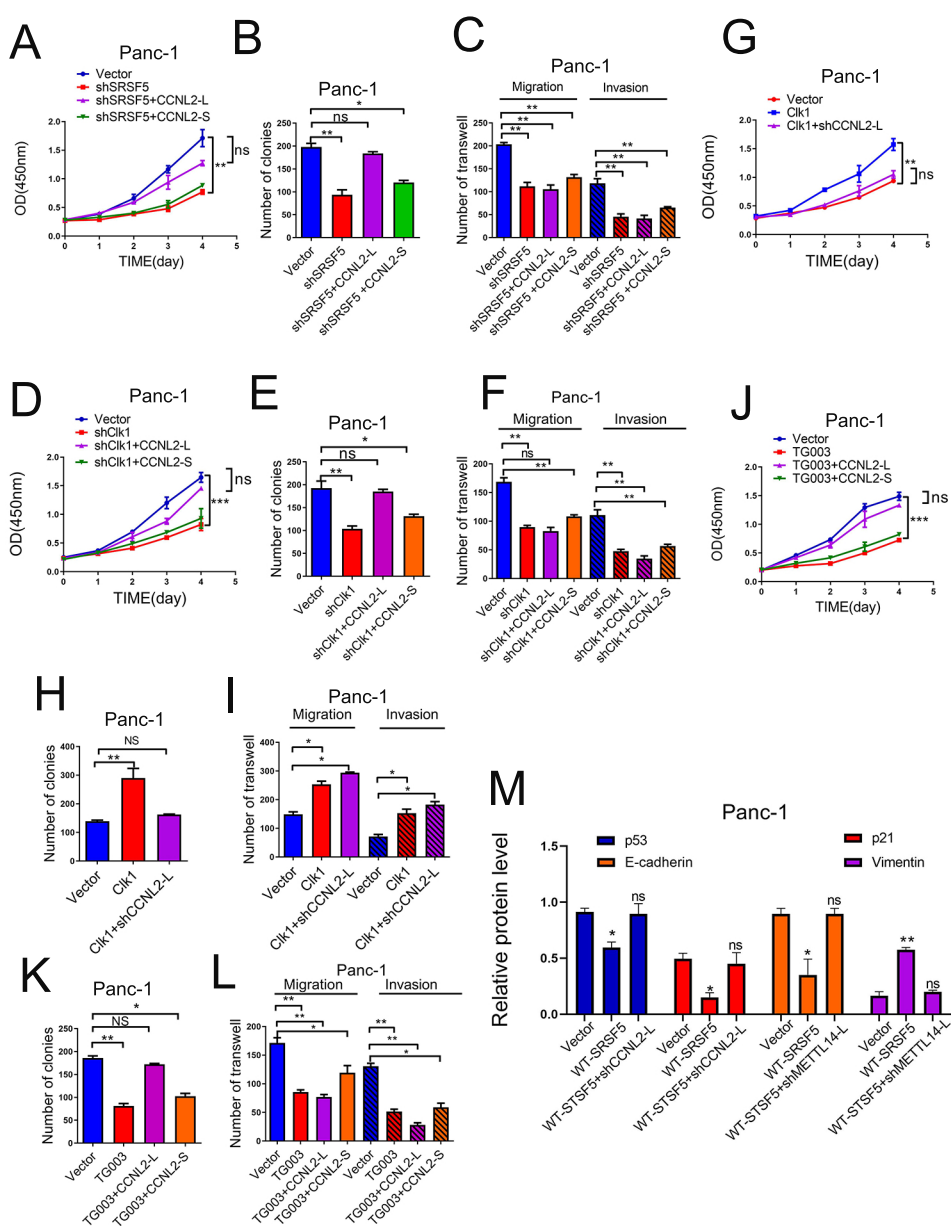

Supplemental Figure 8
